# Supplementary material for: The OPTIMISE project: protocol for a mixed methods, pragmatic, quasi-experimental trial to improve primary care delivery to refugees in Australia
Source: Springer Nature journal article supplement (doi:10.1186/s12913-019-4235-6), 2019-06-19
Supplement: MOESM1 [file 16826864]

## Action plan template

| <b>GOALS</b>                                                                                                                                                                                  |                                                                                                                                                                                                                       |                                                                                        |                        |                       |                                                            |          |
|-----------------------------------------------------------------------------------------------------------------------------------------------------------------------------------------------|-----------------------------------------------------------------------------------------------------------------------------------------------------------------------------------------------------------------------|----------------------------------------------------------------------------------------|------------------------|-----------------------|------------------------------------------------------------|----------|
| Priority intervention from list above. E.g. A whole of practice protocol for using interpreters, and staff with appropriate knowledge and skills in their role supporting use of interpreters |                                                                                                                                                                                                                       |                                                                                        |                        |                       |                                                            |          |
| Practice characteristics: e.g. practice size/governance, refugee population characteristics, availability of bilingual staff that may affect the practice's choice of objectives and actions. |                                                                                                                                                                                                                       |                                                                                        |                        |                       |                                                            |          |
| Objectives                                                                                                                                                                                    | Existing Practice resources and new resources                                                                                                                                                                         | ACTIONS TO ACHIEVE GOAL                                                                | Completion TARGET DATE | WHO IS RESPONSIBLE    | WHAT EVIDENCE CAN WE USE TO SHOW IF WE'VE BEEN SUCCESSFUL? | PROGRESS |
| SMART objective that fits with priority intervention area above<br><br>e.g. Improve usage of interpreters by all staff in the practice                                                        | List of resources that practices may use to achieve objective. Resources will be reviewed for quality and contextual appropriateness prior to inclusion on this list.<br><br>e.g. TIS Doctor's Priority Line brochure | Task #1<br><br>e.g. Register all GPs in the practice with individual TIS client codes. | November 2017          | e.g. Practice manager | All GPs are registered with individual TIS client codes    |          |
|                                                                                                                                                                                               |                                                                                                                                                                                                                       | Task #2                                                                                |                        |                       |                                                            |          |
|                                                                                                                                                                                               |                                                                                                                                                                                                                       | Task #3                                                                                |                        |                       |                                                            |          |
