# Supplementary material for: The OPTIMISE project: protocol for a mixed methods, pragmatic, quasi-experimental trial to improve primary care delivery to refugees in Australia
Source: Springer Nature journal article supplement (doi:10.1186/s12913-019-4235-6), 2019-06-19
Supplement: MOESM2 [file 16826864]

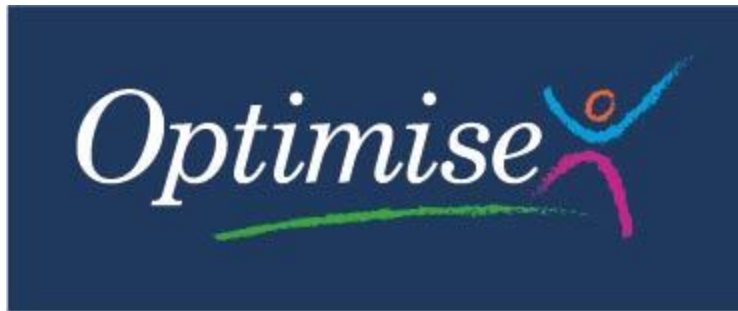

# Practice Description Survey

Version date: 11<sup>th</sup> September 2017

Thank you for taking the time to complete this survey. Your responses to this survey will help us to understand how your practice is currently organised, what information systems are used, who works here and what kinds of policies and procedures you have in place for working with patients. When responding to the questions, please feel free to involve others in the practice, including the OPTIMISE Practice Team members.

Q1 **Name** of practice

---

---

Q2 **Address** of practice

---

---

Q3 What is your **name and contact number** (We will get in touch with you if we have any questions of clarification.)

---

---

Q4 What is **your role** in the practice

---

---

Q5 Please indicate **who else in the practice helped to complete the survey** (if relevant)

---

---

---

**SECTION A: About Your Practice Staff**

These questions will help us to understand how OPTIMISE works in different contexts, including the size and staffing levels and profession mix of practices.

We are asking for the names of staff to help us to ensure consent has been documented.

Q6 Please list the name(s) of the **general practitioners** who work in your practice:

|    | Name of General Practitioner(s) | Gender | Languages spoken | Sessions or half-days per week |
|----|---------------------------------|--------|------------------|--------------------------------|
| 1  |                                 |        |                  |                                |
| 2  |                                 |        |                  |                                |
| 3  |                                 |        |                  |                                |
| 4  |                                 |        |                  |                                |
| 5  |                                 |        |                  |                                |
| 6  |                                 |        |                  |                                |
| 7  |                                 |        |                  |                                |
| 8  |                                 |        |                  |                                |
| 9  |                                 |        |                  |                                |
| 10 |                                 |        |                  |                                |

Q7 Does your practice employ **practice nurses**?

- Yes. Please go to Q7.1
- No. Please go to Q8

Q7.1 Please list the name(s) of the **practice nurses** who work in your practice:

|   | Name of Practice Nurse(s) | Gender | Languages spoken | Sessions or half-days per week |
|---|---------------------------|--------|------------------|--------------------------------|
| 1 |                           |        |                  |                                |
| 2 |                           |        |                  |                                |
| 3 |                           |        |                  |                                |
| 4 |                           |        |                  |                                |
| 5 |                           |        |                  |                                |

Q8 Please list the name(s) of the **practice managers** who work in your practice: A practice manager is responsible for the business management of the practice

|   | Name of Practice Manager(s) | Gender | Languages spoken | Sessions or half-days per week |
|---|-----------------------------|--------|------------------|--------------------------------|
| 1 |                             |        |                  |                                |
| 2 |                             |        |                  |                                |
| 3 |                             |        |                  |                                |
| 4 |                             |        |                  |                                |
| 5 |                             |        |                  |                                |

Q9 Does your practice employ **reception or administrative staff**?

Yes. Please go to Q9.1

No. Please go to Q10

Q9.1 Please list the name(s) of the **receptionist and administrative staff** who work in your practice:

|   | Name of Receptionist or Administrative Staff Member(s) | Gender | Languages spoken | Sessions or half-days per week |
|---|--------------------------------------------------------|--------|------------------|--------------------------------|
| 1 |                                                        |        |                  |                                |
| 2 |                                                        |        |                  |                                |
| 3 |                                                        |        |                  |                                |
| 4 |                                                        |        |                  |                                |
| 5 |                                                        |        |                  |                                |

Q10 Are there any **other staff**, including allied health professionals, who work in your practice:

|   | Name | Discipline<br>(e.g. physio,<br>psychologist) | Gender | Languages<br>spoken | Sessions or<br>half-days per<br>week |
|---|------|----------------------------------------------|--------|---------------------|--------------------------------------|
| 1 |      |                                              |        |                     |                                      |
| 2 |      |                                              |        |                     |                                      |
| 3 |      |                                              |        |                     |                                      |
| 4 |      |                                              |        |                     |                                      |
| 5 |      |                                              |        |                     |                                      |

**SECTION B: Roles and functions performed by staff in the practice**

These questions explore the way you allocate different tasks and functions in the practice. This will help to design and implement strategies/activities.

Q11 Do nursing staff have **access to medical records** within Medical Director or Best Practice?

- Yes, all nurses do
- No, no nurses do
- Some nurses do (please explain why your response in the box below)

---

**Q12 Appointments**

Please indicate **who is responsible** for the **following functions in the practice**, especially as they **relate to refugees**.

You can use the "Other" column and comments box below if you need to.

|                                                                                           | Not done in our practice | Doctors                  | Practice nurse           | Practice manager         | Reception/admin          | Other (please specify in comments box below) |
|-------------------------------------------------------------------------------------------|--------------------------|--------------------------|--------------------------|--------------------------|--------------------------|----------------------------------------------|
| 1. Triage patients to decide the order of access to appointments based on urgency of need | <input type="checkbox"/> | <input type="checkbox"/> | <input type="checkbox"/> | <input type="checkbox"/> | <input type="checkbox"/> | <input type="checkbox"/>                     |

Q12.1 Comments

---

---

**Q13 Consultation/support**

Please indicate **who is responsible** for the **following functions in the practice**, especially as they **relate to refugees**.

You can use the "Other" column and comments box below if you need to.

|                                                                                                 | Not done<br>in our<br>practice<br>(1) | Doctors<br>(2)           | Practice<br>nurse (3)    | Practice<br>manager<br>(4) | Reception/<br>admin (5)  | Other<br>(please<br>specify in<br>comments<br>box below)<br>(6) |
|-------------------------------------------------------------------------------------------------|---------------------------------------|--------------------------|--------------------------|----------------------------|--------------------------|-----------------------------------------------------------------|
| 1. Establish whether a patient needs an interpreter                                             | <input type="checkbox"/>              | <input type="checkbox"/> | <input type="checkbox"/> | <input type="checkbox"/>   | <input type="checkbox"/> | <input type="checkbox"/>                                        |
| 2. Book an interpreter                                                                          | <input type="checkbox"/>              | <input type="checkbox"/> | <input type="checkbox"/> | <input type="checkbox"/>   | <input type="checkbox"/> | <input type="checkbox"/>                                        |
| 3. Provide or support direct clinical care with an interpreter present (in person or on 'phone) | <input type="checkbox"/>              | <input type="checkbox"/> | <input type="checkbox"/> | <input type="checkbox"/>   | <input type="checkbox"/> | <input type="checkbox"/>                                        |
| 4. Co-ordinates the conduct of health assessments                                               | <input type="checkbox"/>              | <input type="checkbox"/> | <input type="checkbox"/> | <input type="checkbox"/>   | <input type="checkbox"/> | <input type="checkbox"/>                                        |
| 5. Provide refugee health assessments                                                           | <input type="checkbox"/>              | <input type="checkbox"/> | <input type="checkbox"/> | <input type="checkbox"/>   | <input type="checkbox"/> | <input type="checkbox"/>                                        |
| 6. Provide immunisations                                                                        | <input type="checkbox"/>              | <input type="checkbox"/> | <input type="checkbox"/> | <input type="checkbox"/>   | <input type="checkbox"/> | <input type="checkbox"/>                                        |

**Q13.1 Comments**

---



---

**Q14 Information systems**

Please indicate **who is responsible** for the **following functions in the practice**, especially as they **relate to refugees**.

You can use the "Other" column and comments box below if you need to.

|                                                                    | Not done in our practice | Doctors                  | Practice nurse           | Practice manager         | Reception/admin          | Other (please specify in comments box below) |
|--------------------------------------------------------------------|--------------------------|--------------------------|--------------------------|--------------------------|--------------------------|----------------------------------------------|
| 1. Maintain a refugee patient register                             | <input type="checkbox"/> | <input type="checkbox"/> | <input type="checkbox"/> | <input type="checkbox"/> | <input type="checkbox"/> | <input type="checkbox"/>                     |
| 2. Collect and collate information about refugee relevant services | <input type="checkbox"/> | <input type="checkbox"/> | <input type="checkbox"/> | <input type="checkbox"/> | <input type="checkbox"/> | <input type="checkbox"/>                     |
| 3. Maintain directories of available services & programs           | <input type="checkbox"/> | <input type="checkbox"/> | <input type="checkbox"/> | <input type="checkbox"/> | <input type="checkbox"/> | <input type="checkbox"/>                     |
| 4. Update clinical guidelines, pathways, protocols                 | <input type="checkbox"/> | <input type="checkbox"/> | <input type="checkbox"/> | <input type="checkbox"/> | <input type="checkbox"/> | <input type="checkbox"/>                     |

Q14.1 Comments

---



---



**Q15 Follow up/Referral**

Please indicate **who is responsible** for the **following functions in the practice**, especially as they **relate to refugees**.

You can use the "Other" column and comments box below if you need to.

|                                                                                            | Not done in our practice | Doctors                  | Practice nurse           | Practice manager         | Reception/admin          | Other (please specify in comments box below) |
|--------------------------------------------------------------------------------------------|--------------------------|--------------------------|--------------------------|--------------------------|--------------------------|----------------------------------------------|
| 1. Manage patient recall for abnormal test results                                         | <input type="checkbox"/> | <input type="checkbox"/> | <input type="checkbox"/> | <input type="checkbox"/> | <input type="checkbox"/> | <input type="checkbox"/>                     |
| 2. Follow up patients who do not attend a previously scheduled appointment in the practice | <input type="checkbox"/> | <input type="checkbox"/> | <input type="checkbox"/> | <input type="checkbox"/> | <input type="checkbox"/> | <input type="checkbox"/>                     |
| 3. Arrange follow-up appointments at the practice                                          | <input type="checkbox"/> | <input type="checkbox"/> | <input type="checkbox"/> | <input type="checkbox"/> | <input type="checkbox"/> | <input type="checkbox"/>                     |
| 4. Follow up to confirm that patients attended referral to external service                | <input type="checkbox"/> | <input type="checkbox"/> | <input type="checkbox"/> | <input type="checkbox"/> | <input type="checkbox"/> | <input type="checkbox"/>                     |

Q15.1 Comments

---



---

**Q16 Staff development/quality improvement**

Please indicate **who is responsible** for the **following functions in the practice**, especially as they **relate to refugees**.

You can use the "Other" column and comments box below if you need to.

|                                                                                               | Not done in our practice | Doctors                  | Practice nurse           | Practice manager         | Reception/admin          | Other (please specify in comments box below) |
|-----------------------------------------------------------------------------------------------|--------------------------|--------------------------|--------------------------|--------------------------|--------------------------|----------------------------------------------|
| 1. Organise staff training                                                                    | <input type="checkbox"/> | <input type="checkbox"/> | <input type="checkbox"/> | <input type="checkbox"/> | <input type="checkbox"/> | <input type="checkbox"/>                     |
| 2. Audit medical records for quality improvement                                              | <input type="checkbox"/> | <input type="checkbox"/> | <input type="checkbox"/> | <input type="checkbox"/> | <input type="checkbox"/> | <input type="checkbox"/>                     |
| 3. Ensure patient education and other materials are available in languages other than English | <input type="checkbox"/> | <input type="checkbox"/> | <input type="checkbox"/> | <input type="checkbox"/> | <input type="checkbox"/> | <input type="checkbox"/>                     |

Q26.1 Comments

---



---

Q17 Are there **other important functions** that are undertaken that are **relevant to providing care to people with refugee backgrounds** that are not mentioned above? If so, please describe here, and indicate whose role it is.

---



---

Q18 Use this space if you wish to **elaborate on any responses above**

---

---

**SECTION C: About the systems in your practice**

These questions help us to understand the context in which you will implement change.

Q19 What are the **opening hours** of the practice?

|       | Monday | Tuesday | Wednesday | Thursday | Friday | Saturday | Sunday |
|-------|--------|---------|-----------|----------|--------|----------|--------|
| Hours |        |         |           |          |        |          |        |

Q20 Does the practice have an **appointment system**?

- Yes. *Please go to Q20.1*
- No. *Please go to Q21*

Q20.1 What is the booking interval (time allowed) for a **standard appointment** with the doctor?

- Less than 5 minutes
  - 5-10 minutes
  - 11-15 minutes
  - 16-20 minutes
  - More than 20 minutes
-

Q20.2 What is the usual booking interval (time allowed) for a **new patient appointment**?

- Less than 5 minutes
- 5-10 minutes
- 11-15 minutes
- 16-20 minutes
- More than 20 minutes

Q21 Do you **confirm appointments** with patients a before scheduled visits?

- Always or almost always. *Please go to Q21.1*
- Often. *Please go to Q21.1*
- Sometimes. *Please go to Q21.1*
- Rarely or never. *Please go to Q22*
- Don't know or not applicable. *Please go to Q22*

Q21.1 **How do you confirm appointments**? For example, by phone, email or SMS

---

---

---

Q22 Does the practice promote the **use of the patient held electronic health record** (that is, My Health Record) to patients?

- Yes. *Please go to Q22.1*
- No. *Please go to Q23*
- Don't know. *Please go to Q23*

Q22.1 How do you promote the patient held electronic health record to patients? e.g. who is responsible, what information is provided to patients?

---

---

Q23 Does your practice **use HealthPathways or Map of Medicine**?

- Always or almost always
- Often
- Sometimes
- Rarely or never
- Don't know

Q24 Does the practice offer patients **privacy** when requesting or providing personal information (to front-of-house/reception staff or clinicians)? For example taking the patient to a separate room when asking about their background, past medical care, etc. or provide sensitive information or advice.

- Yes
- No

Q25 Does the practice **bulk-bill** any patients?

- Yes. *Please go to Q25.1*
- No. *Please go to Q26*

Q25.1 Please describe **who is bulk billed** (e.g. health care card only, all with Medicare card)

---

---

Q26 How does the practice bill **refugee patients who do not have a Medicare card**?

---

---

Q27 Does the practice use the **Health Assessment Medicare items when providing care to refugee patients**? For example, the MBS Item Numbers 701, 703, 705, 707 (noting that these are not specific to refugees)

- Yes. *Please go to Q27.1*
- No
- Don't know

Q27.1 Please explain how you use these Health Assessment items.

---

---

---

---

---

---

Q28 Does the practice have **regular practice meetings for clinical staff?**

- Yes, please state how often \_\_\_\_\_
- No.
- Don't know
- Not applicable

Q29 Does the practice have **regular practice meetings for non-clinical staff?**

- Yes, please state how often and whether these are combined with clinical staff  
\_\_\_\_\_
- No
- Don't know
- Not applicable

Q28.1/29.1

If you responded 'NO' to Q28 or Q29, how do you communicate with staff about significant changes within the practice?

---

---

Q30 Does the practice use **professional translation & interpreting services?**

|              | Yes                   | No                    | Don't know            | No need               |
|--------------|-----------------------|-----------------------|-----------------------|-----------------------|
| By Telephone | <input type="radio"/> | <input type="radio"/> | <input type="radio"/> | <input type="radio"/> |
| Face-to-face | <input type="radio"/> | <input type="radio"/> | <input type="radio"/> | <input type="radio"/> |

If you answered 'YES' to using professional translating and interpreting services via telephone or face-to-face, please go to Q30.1.

Otherwise, please go to Q31

Q30.1 Which **languages** do you most **commonly use**? Select up to 5 from the list below.



- |                          |                                     |                          |                 |
|--------------------------|-------------------------------------|--------------------------|-----------------|
| <input type="checkbox"/> | Albanian                            | <input type="checkbox"/> | Kirundi (Rundi) |
| <input type="checkbox"/> | Amharic                             | <input type="checkbox"/> | Krio            |
| <input type="checkbox"/> | Arabic                              | <input type="checkbox"/> | Kurdish         |
| <input type="checkbox"/> | Aramaic                             | <input type="checkbox"/> | Nepali          |
| <input type="checkbox"/> | Assyrian or Assyrian Neo<br>Aramaic | <input type="checkbox"/> | Nuer            |
| <input type="checkbox"/> | Bari                                | <input type="checkbox"/> | Oromo           |
| <input type="checkbox"/> | Bosnian                             | <input type="checkbox"/> | Pashto          |
| <input type="checkbox"/> | Burmese                             | <input type="checkbox"/> | Persian         |
| <input type="checkbox"/> | Chaldean Neo Aramaic                | <input type="checkbox"/> | Serbian         |
| <input type="checkbox"/> | Chin and related languages          | <input type="checkbox"/> | Shilluk         |
| <input type="checkbox"/> | Croatian                            | <input type="checkbox"/> | Somali          |
| <input type="checkbox"/> | Dan (Gio-Dan)                       | <input type="checkbox"/> | Swahili         |
| <input type="checkbox"/> | Dari                                | <input type="checkbox"/> | Tamil           |
| <input type="checkbox"/> | Dinka                               | <input type="checkbox"/> | Tigrinya        |
| <input type="checkbox"/> | Farsi                               | <input type="checkbox"/> | Turkish         |
| <input type="checkbox"/> | Hakka                               | <input type="checkbox"/> | Urdu            |
| <input type="checkbox"/> | Hazaraghi                           | <input type="checkbox"/> | Vietnamese      |
| <input type="checkbox"/> | Karen                               | <input type="checkbox"/> | Zophei          |
| <input type="checkbox"/> | Karen S'Gaw                         |                          |                 |

Q30.1.1 Please note any other commonly used languages here

---

Q30.2 Which languages are most difficult to find professional interpreters for? Select up to 5 from the list below.

- |                          |                                     |                          |                 |
|--------------------------|-------------------------------------|--------------------------|-----------------|
| <input type="checkbox"/> | Albanian                            | <input type="checkbox"/> | Kirundi (Rundi) |
| <input type="checkbox"/> | Amharic                             | <input type="checkbox"/> | Krio            |
| <input type="checkbox"/> | Arabic                              | <input type="checkbox"/> | Kurdish         |
| <input type="checkbox"/> | Aramaic                             | <input type="checkbox"/> | Nepali          |
| <input type="checkbox"/> | Assyrian or Assyrian Neo<br>Aramaic | <input type="checkbox"/> | Nuer            |
| <input type="checkbox"/> | Bari                                | <input type="checkbox"/> | Oromo           |
| <input type="checkbox"/> | Bosnian                             | <input type="checkbox"/> | Pashto          |
| <input type="checkbox"/> | Burmese                             | <input type="checkbox"/> | Persian         |
| <input type="checkbox"/> | Chaldean Neo Aramaic                | <input type="checkbox"/> | Serbian         |
| <input type="checkbox"/> | Chin and related languages          | <input type="checkbox"/> | Shilluk         |
| <input type="checkbox"/> | Croatian                            | <input type="checkbox"/> | Somali          |
| <input type="checkbox"/> | Dan (Gio-Dan)                       | <input type="checkbox"/> | Swahili         |
| <input type="checkbox"/> | Dari                                | <input type="checkbox"/> | Tamil           |
| <input type="checkbox"/> | Dinka                               | <input type="checkbox"/> | Tigrinya        |
| <input type="checkbox"/> | Farsi                               | <input type="checkbox"/> | Turkish         |
| <input type="checkbox"/> | Hakka                               | <input type="checkbox"/> | Urdu            |
| <input type="checkbox"/> | Hazaraghi                           | <input type="checkbox"/> | Vietnamese      |
| <input type="checkbox"/> | Karen                               | <input type="checkbox"/> | Zophei          |
| <input type="checkbox"/> | Karen S'Gaw                         |                          |                 |

Q30.2.1 Please note any other languages for which finding professional interpreters is difficult here

---

Q31 Availability of information in appropriate languages

|                                                                                                                | Yes - for all patients who need it | Yes - for some patients who need it | No                    | Don't know or not applicable |
|----------------------------------------------------------------------------------------------------------------|------------------------------------|-------------------------------------|-----------------------|------------------------------|
| Does the practice provide information about clinic opening hours and services available in multiple languages? | <input type="radio"/>              | <input type="radio"/>               | <input type="radio"/> | <input type="radio"/>        |
| Are waiting room signs written in languages other than English?                                                | <input type="radio"/>              | <input type="radio"/>               | <input type="radio"/> | <input type="radio"/>        |

If you answered 'YES – SOME PATIENTS' please go to Q31.1  
 Otherwise, go to Section D

Q31.1 Please describe how you determine which patients need these services or strategies.

---



---



---

**SECTION D: About the patients in your practice** If you don't have the precise information, please "estimate" numbers and proportions to answer the questions in this section. You will be asked at the end of this section whether your estimates are based on your own views, discussion with others or checking the practice databases or records.

**Practice Patient Profile**

Q32 What is the (estimated) **total number of active patients** on the practice's books (that is, the number of patients visiting the practice approximately 3 times in the past 2 years)

---

Q33 What are the **predominant cultural or ethnic groups** in your practice, and what proportion of the practice would each group represent?

|   | Predominant cultural or ethnic group | Estimated % of all patients |
|---|--------------------------------------|-----------------------------|
| 1 |                                      |                             |
| 2 |                                      |                             |
| 3 |                                      |                             |
| 4 |                                      |                             |
| 5 |                                      |                             |

Q34 Can you estimate the proportion of **active patients** in the practice who have a **refugee (or refugee-like) background?** (active = have visited 3 times in the past 2 years)

---

Q35 Please choose the **best description** of the **source of your information** from the following statements:

- The figures above are based on my own estimates
- The figures above are based on discussions with others in the practice
- The figures above are based on reviewing databases such as patient registers or auditing medical records

Q36 Use this space if you wish to elaborate on any responses above.

---



---

### Patient Register and Recall

Q37 Does the practice **record the following information for new patients?**

|                                 | Always or almost      | Often                 | Sometimes             | Rarely or never       | Don't know or not applicable |
|---------------------------------|-----------------------|-----------------------|-----------------------|-----------------------|------------------------------|
| Employment status               | <input type="radio"/> | <input type="radio"/> | <input type="radio"/> | <input type="radio"/> | <input type="radio"/>        |
| Healthcare card holder          | <input type="radio"/> | <input type="radio"/> | <input type="radio"/> | <input type="radio"/> | <input type="radio"/>        |
| Country of birth                | <input type="radio"/> | <input type="radio"/> | <input type="radio"/> | <input type="radio"/> | <input type="radio"/>        |
| Refugee or asylum seeker status | <input type="radio"/> | <input type="radio"/> | <input type="radio"/> | <input type="radio"/> | <input type="radio"/>        |
| Country of origin               | <input type="radio"/> | <input type="radio"/> | <input type="radio"/> | <input type="radio"/> | <input type="radio"/>        |
| Year of arrival in Australia    | <input type="radio"/> | <input type="radio"/> | <input type="radio"/> | <input type="radio"/> | <input type="radio"/>        |
| Need for an interpreter         | <input type="radio"/> | <input type="radio"/> | <input type="radio"/> | <input type="radio"/> | <input type="radio"/>        |
| Preferred language              | <input type="radio"/> | <input type="radio"/> | <input type="radio"/> | <input type="radio"/> | <input type="radio"/>        |

Q38 **Where in the medical record** does the practice usually record the following information?

|                                             | Not routinely collected | Warning section of clinical record | Social history section of clinical record | Progress notes in clinical record | Defined fields in billing software | As free text in billing software | Other (please specify in comment box below) |
|---------------------------------------------|-------------------------|------------------------------------|-------------------------------------------|-----------------------------------|------------------------------------|----------------------------------|---------------------------------------------|
| Employment status                           | <input type="radio"/>   | <input type="radio"/>              | <input type="radio"/>                     | <input type="radio"/>             | <input type="radio"/>              | <input type="radio"/>            | <input type="radio"/>                       |
| Healthcare card holder                      | <input type="radio"/>   | <input type="radio"/>              | <input type="radio"/>                     | <input type="radio"/>             | <input type="radio"/>              | <input type="radio"/>            | <input type="radio"/>                       |
| Country of birth                            | <input type="radio"/>   | <input type="radio"/>              | <input type="radio"/>                     | <input type="radio"/>             | <input type="radio"/>              | <input type="radio"/>            | <input type="radio"/>                       |
| Refugee background including asylum seekers | <input type="radio"/>   | <input type="radio"/>              | <input type="radio"/>                     | <input type="radio"/>             | <input type="radio"/>              | <input type="radio"/>            | <input type="radio"/>                       |
| Country of origin                           | <input type="radio"/>   | <input type="radio"/>              | <input type="radio"/>                     | <input type="radio"/>             | <input type="radio"/>              | <input type="radio"/>            | <input type="radio"/>                       |
| Year of arrival in Australia                | <input type="radio"/>   | <input type="radio"/>              | <input type="radio"/>                     | <input type="radio"/>             | <input type="radio"/>              | <input type="radio"/>            | <input type="radio"/>                       |
| Need for an interpreter                     | <input type="radio"/>   | <input type="radio"/>              | <input type="radio"/>                     | <input type="radio"/>             | <input type="radio"/>              | <input type="radio"/>            | <input type="radio"/>                       |

Q39 Comments

---



---



---



---



---



Q40 How does the practice know or confirm that a patient **needs an interpreter**?

- Patient is asked whether he/she needs an interpreter
- Patient requests an interpreter
- Other \_\_\_\_\_

Q41 Do the following staff have **access to the information** the practice has recorded about **refugee or asylum seeker status**?

|                                   | Yes, usually          | Yes, sometimes        | No                    | Don't know or not applicable |
|-----------------------------------|-----------------------|-----------------------|-----------------------|------------------------------|
| Reception or administrative staff | <input type="radio"/> | <input type="radio"/> | <input type="radio"/> | <input type="radio"/>        |
| Practice nurses                   | <input type="radio"/> | <input type="radio"/> | <input type="radio"/> | <input type="radio"/>        |
| Doctors                           | <input type="radio"/> | <input type="radio"/> | <input type="radio"/> | <input type="radio"/>        |
| Other, please specify             | <input type="radio"/> | <input type="radio"/> | <input type="radio"/> | <input type="radio"/>        |

Q42 If you have any other information that you think it is important to capture, please include it here.

---



---



---



---

End of Practice Description Survey
