# Supplementary material for: The OPTIMISE project: protocol for a mixed methods, pragmatic, quasi-experimental trial to improve primary care delivery to refugees in Australia
Source: Springer Nature journal article supplement (doi:10.1186/s12913-019-4235-6), 2019-06-19
Supplement: MOESM4 [file 16826864]

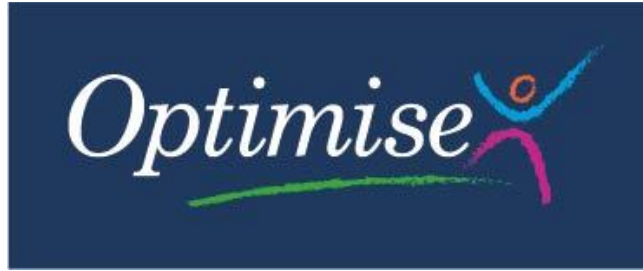

# Baseline Refugee Healthcare Survey

Version date: 11<sup>h</sup> September 2017

Q1 **Name and address** of practice

---

---

---

Q2 Please indicate **who in the practice was involved in completing the survey**

---

---

---

---

Q3 Please note the names of **research team members involved in completing the survey**

---

**SECTION A: NEW PATIENT PRESENTATIONS TO THE PRACTICE**

Q4 How do **new patients with refugee backgrounds** currently **come to your practice**? (tick all that apply)

|                                                           | Always or almost always | Often                 | Sometimes             | Rarely or never       | Don't know            |
|-----------------------------------------------------------|-------------------------|-----------------------|-----------------------|-----------------------|-----------------------|
| Referred by settlement services                           | <input type="radio"/>   | <input type="radio"/> | <input type="radio"/> | <input type="radio"/> | <input type="radio"/> |
| Referred by refugee health nurse                          | <input type="radio"/>   | <input type="radio"/> | <input type="radio"/> | <input type="radio"/> | <input type="radio"/> |
| Referred by sponsor                                       | <input type="radio"/>   | <input type="radio"/> | <input type="radio"/> | <input type="radio"/> | <input type="radio"/> |
| Make their own appointment (or made by family or friends) | <input type="radio"/>   | <input type="radio"/> | <input type="radio"/> | <input type="radio"/> | <input type="radio"/> |
| Walk in                                                   | <input type="radio"/>   | <input type="radio"/> | <input type="radio"/> | <input type="radio"/> | <input type="radio"/> |

Q5 How does the practice **collect/confirm refugee or asylum seeker status** for a new patient? (e.g., from referral information; patients are routinely asked; If they are asked, when are they asked, who asks them, and where in the practice? )

---



---



---

Q6 Does the practice have any **written policies and protocols** about **recognising and recording patients with a refugee background**? If yes, please ask the respondents to provide copies after the survey has been completed.

- Yes
- No
- Don't know

Q7 Does the practice **collect/confirm refugee patients' year of arrival** to Australia?

- Yes
- No
- Don't know

*Ask This Question:*

*If the response to Q7 is Yes*

Q7.1 How does the practice **collect/confirm** their **year of arrival**? (i.e. how are patients asked – by whom, when, where?)

---

---

Q8 Are **new patients** asked what their **language** preferences are?

- Always or almost always
- Often
- Sometimes
- Rarely or never
- Don't know

*Ask This Question:*

*If response to Q5 above is: Always or almost always OR Often OR Sometimes*

Q8.1 **How are patients asked** about their language preferences?

(include details of who is responsible, when and where patients are asked about language preferences, and whether **all refugee patients** are asked)

---

---

---

Q9 Are **language preferences recorded** in a patient's medical record?

- Always or almost always
- Often
- Sometimes
- Rarely or never
- Don't know

Q10 Is the **need for an interpreter** recorded in a patient's medical record?

- Always or almost always
- Often
- Sometimes
- Rarely or never
- Don't know

*Ask This Question:*

*If response to Q7 is: Always or almost always OR Often OR Sometimes*

Q10.1 **How is the need for an interpreter recorded?** (include details of who is responsible, where in the medical record the information is noted, and whether the information is recorded for **refugee patients** in particular)

---

---

---

Q11 Does your practice **receive assistance from outside organisations** (like Primary Health Networks, Refugee Health Programs within the Local Health Authority) with **managing refugee patients**?

- Yes
- No
- Don't know

*Ask This Question:*

*If response to Q8 is Yes*

Q11.1 If yes, what organisations or services (please note regional differences)

- Refugee Health Fellow program
- Refugee Health Nurse program
- Local Primary Health Network (SEMPHN, NWMPHN or SWSPHN)
- Local Settlement Services (AMES Australia, Settlement Services International). If a different settlement service, please specify  
\_\_\_\_\_
- Victorian Refugee Health Network (Foundation House, Victorian Foundation for Survivors of Torture)
- Other, please specify  
\_\_\_\_\_

Q12 Research officer: *Record any comments about initial contact with patients with a refugee background made while answering the questions above or subsequently.*

\_\_\_\_\_

\_\_\_\_\_

---

## SECTION B: USE OF INTERPRETING SERVICES

Q13 Does your practice use **professional translating and interpreting services** (TIS National)?

|              | Yes                   | No                    | Don't know            | No need               |
|--------------|-----------------------|-----------------------|-----------------------|-----------------------|
| By telephone | <input type="radio"/> | <input type="radio"/> | <input type="radio"/> | <input type="radio"/> |
| Face-to-face | <input type="radio"/> | <input type="radio"/> | <input type="radio"/> | <input type="radio"/> |

Q14 In your opinion, are **GPs** in the practice generally **uncomfortable working with interpreters**?

- Yes
- No
- Don't know

Q15 Has **training** on how to work with interpreters been offered to **GPs** by the practice?

- Yes
- No
- Don't know

*Ask This Question:*

*If response to Q13 is Yes*

Q15.1 **Please provide details** about any training GPs may have received on working with interpreters.

e.g. what type of training, when & who provided it? How many GPs participated?

---

---

---

Q16 In your opinion, are **nurses and other clinical staff** in the practice generally **uncomfortable working with interpreters?**

- Yes
- No
- Don't know

Q17 Has **training** in how to work with interpreters been offered to **nurses and other clinical staff** by the practice?

- Yes
- No
- Don't know

*Display This Question:*

*If the response to Q15 is Yes*

Q17.1 **Please provide details** about any training nurses and other clinical staff may have received on working with interpreters.

e.g. what type of training, when & who provided it? How many nurses and other clinical staff participated?

---

---

---



Q18 In your opinion, are **reception staff** generally **uncomfortable working with interpreters**?

- Yes
- No
- Don't know

Q19 Has **training** on how to work with interpreters been offered to **reception staff** by the practice?

- Yes
- No
- Don't know

*Display This Question:*  
*If the response to Q17 is Yes*

Q19.1 **Please provide details** about any reception staff may have received on working with interpreters. What type of training, when & who provided it? How many reception staff participated?

---

---

---

---

Q20 Does your **practice display and/or provide information to patients about the availability of interpreter services** at the practice? If yes, please ask the respondents to provide copies after the survey has been completed.

- Yes
- No
- Don't know

Q21 Does each clinician/office have a **speaker phone**?

- Yes
- No
- Don't know

Q22 Do phones have a **TIS sticker** on them?

- Yes
- No
- Don't know

Q23 Research officer: *Record any comments about use of interpreting services made while answering the questions above or subsequently.*

---

---

---

---

**SECTION C: ASSESSMENTS AND HEALTHCARE**

Q24 These questions relate to refugee health assessments

|                                                                                                                           | Yes                   | No                    | Don't know            | Not done in this practice |
|---------------------------------------------------------------------------------------------------------------------------|-----------------------|-----------------------|-----------------------|---------------------------|
| Does your practice use a Refugee Health Assessment template for screening people that have arrived in the last 12 months? | <input type="radio"/> | <input type="radio"/> | <input type="radio"/> | <input type="radio"/>     |
| Does your practice set aside specific appointment times for completion of refugee health assessments?                     | <input type="radio"/> | <input type="radio"/> | <input type="radio"/> | <input type="radio"/>     |
| Are longer appointments booked for refugee health assessments?                                                            | <input type="radio"/> | <input type="radio"/> | <input type="radio"/> | <input type="radio"/>     |
| Is the practice nurse involved in refugee health assessments?                                                             | <input type="radio"/> | <input type="radio"/> | <input type="radio"/> | <input type="radio"/>     |

Q25 Research officer: *Record any comments about undertaking refugee health assessments made while answering the questions above or subsequently.*

---



---



---

**SECTION D: REFERRAL PATHWAYS FROM THE PRACTICE FOR REFUGEE CLIENTS**

Q26 Does your practice have a **documented process for referral of refugee patients to external services** i.e. specialists, support services, maternal and child health, dental etc. If yes,

please ask practice staff to provide copies of the documented process after the survey has been completed.

- Yes
- No
- Don't know

Q27 Do **staff help refugee patients (who need it) with referrals**, such as making an appointment or advising about potential costs.

- Always or almost always
- Often
- Sometimes
- Rarely or never
- Don't know

Q28 Does the practice have a **documented process to confirm whether refugee patients attended the services to which they were referred?**

If yes, please ask practice staff to provide copies of the documented process after the survey has been completed.

- Yes
- No
- Don't know

Q29 Does the practice have a **list of specialists and services that bulk bill** for refugee patient referrals?

- Yes
- No
- Don't know

Q30 Does the practice have a **list of specialists who are bilingual and what languages they speak?**

- Yes
- No
- Don't know

*Ask This Question:*  
*If the response to Q28 is Yes*

Q30.1 How is the list of bilingual specialists and the languages they speak updated? How do GPs access the list?

---

---

Q31 Research officer: *Record any comments about referral pathways from the practice made while answering the questions above or subsequently.*

---

---

---

---

**SECTION E: COMMUNICATION**

Q32 Does your practice **adjust care to suit refugee patients with low literacy**? e.g. explain repeat scripts or use teach back?

- Yes
- No
- Don't know

*Ask This Question:*  
*If the response to Q30 is Yes*

Q32.1 **Please give some examples** of how your practice adjusts care for refugee patients with low literacy

---

---

---

---

Q33 Do reception staff offer to **help refugee patients** when they are **filling out forms** required to support healthcare delivery (e.g. patient registration) ?

- Yes
- No
- Don't know

Q34 Is health and health service **information provided to refugee patients in simple English**, if required?

- Yes
- No
- Don't know

Q35 Is health and health service **information provided to refugee patients in languages other than English**, if required?

- Yes
- No
- Don't know

Q36 Does your practice **provide refugee patients with updated medication summaries** that describe in easy to understand language what medicines the patient is to take and how? If yes, please ask the respondents to provide an example of one of these lists after the survey has been completed.

- Yes
- No
- Don't know

Q37 Research officer: *Record any comments about communication with patients with refugee backgrounds made while answering the questions above or subsequently.*

---

---

---

**SECTION F: EDUCATION AND TRAINING**

Q38 Have practice staff received any **cultural competency training**?

- Yes
- No
- Don't know

*Ask This Question:*  
*If the response to Q36 is Yes*

Q38.1 **Please give details** of any cultural competency training that practice staff may have received.

e.g. what type of training, when & who provided it? How many GPs, nurses and other staff participated?

---

---

---

---



Q39 Has the practice offered or supported access to any **education or training about refugee health to staff** over the past 12 months?

- Yes
- No
- Don't know

*Ask This Question*

*If the response to Q37 is Yes*

Q39.1 **Please give details** of refugee health training that practice staff may have received. e.g. what type of training, when & who provided it? How many GPs, nurses and other staff participated?

---

---

---

---

Q40 Please describe any **other specific strategies that your practice uses when providing healthcare to patients with refugee (or refugee-like) backgrounds** here.

---

---

---

---

**SECTION G: FINAL QUESTIONS**

Q41 What does your practice **hope to get out of being involved** in the OPTIMISE project?

---

---

---

---

Q42 At the end of the project **how will you know that it was successful for your practice?**  
What changes in your practice would you like to see as a result of the project?

---

---

---

**SECTION H: DOCUMENT CHECKLIST**

Q43 Please check that the practice has provided copies of the following documents (if applicable)

- Policy/protocol for recognising refugee patients and recording this information
  - Signage or patient handouts on the availability of interpreter services (flyers, information booklets, posters etc)
  - Process for referral of refugee patients to external services
  - Process for confirming refugee patients' attendance at services to which they are referred
  - Example medication summary
  - Other, please specify
- 

End of Refugee Healthcare Survey

---

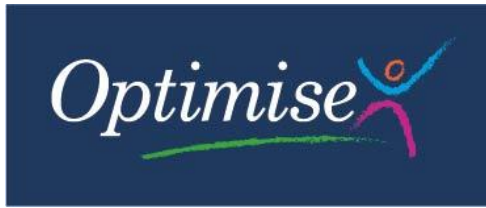

(Post intervention/6 mo follow up) OPTIMISE: Refugee Healthcare Survey

Instructions for researcher: Please review the practice's baseline refugee health care survey responses and the action plans to become familiar with the activities that the practice planned to undertake at the beginning of the intervention. Please take a printed copies of these documents with you to the visit.

When completing sections A-D, first check whether the practice made any changes to routines. If yes, ask all questions in the section as stated. If no, refer to the practice's responses to the questions at baseline at confirm that these responses are the same at post intervention and at 6-months follow up.

Q1 Name and address of practice

---

---

---

Q2 Please note the names and roles of practice staff involved in completing the survey

---

---

---

Q3 Please note the names of research team members involved in completing the survey

---

Q4 Have there been any changes to practice staff in the last 6 months?

- Yes                       No                       Don't know

If yes, please explain in terms of discipline, gender, languages spoken and sessions worked. E.g. one new female, Dari speaking GP works at the practice three afternoons a week.

---

---

The questions in this survey relate to your practice's involvement in the OPTIMISE Project.

As part of this project, several members of your practice worked as a team with a refugee health expert to improve the ways in which your practice organises and delivers care to patients from refugee backgrounds.

## SECTION A: REFUGEE PATIENTS AT YOUR PRACTICE

**Q5** Has your practice changed the way in which you collect/confirm and record refugee or asylum seeker status for patients since taking part in the OPTIMISE Project?

- Yes, proceed to ask Q6 - Q12
- No, confirm practice responses to Q6, Q7 and Q12 are the same as at baseline.

**Q6** Does the practice have any written policies and protocols about recognising and recording patients with a refugee background?

If yes, please ask the respondents to provide copies after the survey has been completed.

- Yes
- No
- Don't know

## NEW PATIENTS

**Q7** Does the practice collect/confirm refugee or asylum seeker status for a new patient?

- Always or almost always
- Often
- Sometimes
- Rarely or never
- Don't know

If response is always/almost always, often or sometimes

**Q7.1** How is refugee or asylum seeker status for a new patient determined? (select all that apply)

- New patients as asked to state their country of birth or ethnicity and year of arrival in the new patient registration form
- New patients are asked whether they are from a refugee background in the new patient registration form (e.g. tick box)
- Staff ask new patients whether they are from a refugee background directly
- Other, please specify \_\_\_\_\_

## EXISTING PATIENTS

**Q8** Does the practice collect/confirm refugee or asylum seeker status for existing patients (if this information is missing)?

- Always or almost always       Often       Sometimes       Rarely or never       Don't know

If response is always/almost always, often or sometimes

**Q8.1** How is refugee or asylum seeker status determined for existing patients? (select all that apply)

- Existing patients are given a form to fill which asks for country of birth or ethnicity and year of arrival
- Existing patients are given a form to fill which asks whether they are from a refugee background
- Staff ask existing patients whether they are from a refugee background directly
- Other, please specify \_\_\_\_\_

## BOTH NEW AND EXISTING PATIENTS

**Q9** Who is responsible for collecting information about refugee or asylum seeker status of both new and existing patients? (select all that apply)

- General practitioners       Practice nurses       Reception or administrative staff       Other, please specify \_\_\_\_\_

**Q10** Where is the information collected about refugee or asylum seeker status recorded? (select all that apply)

- |                                                                                  |                                                                                          |
|----------------------------------------------------------------------------------|------------------------------------------------------------------------------------------|
| <input type="checkbox"/> Warnings box in Medical Director                        | <input type="checkbox"/> Other social history box in Best Practice                       |
| <input type="checkbox"/> Reason for presentation field in Medical Director       | <input type="checkbox"/> Diagnosis in Medical Director or Best Practice                  |
| <input type="checkbox"/> Country of birth and year of arrival fields in Pracsoft | <input type="checkbox"/> A separate refugee patient register (paper based or electronic) |
| <input type="checkbox"/> On screen comments box in Best Practice                 | <input type="checkbox"/> Other, please specify _____                                     |
| <input type="checkbox"/> Ethnicity field in Best Practice                        |                                                                                          |

**Q11** Who is responsible for recording information about refugee or asylum seeker status status (select all that apply) Note: different staff members may be responsible for collecting and recording information

- General practitioners     
  Practice nurses     
  Reception or administrative staff     
  Other, please specify \_\_\_\_\_

**Q12** Do the following staff have access to the information the practice has recorded about refugee or asylum seeker status?

|                                   | Yes, usually             | Yes, sometimes           | No                       | Don't know or not applicable |
|-----------------------------------|--------------------------|--------------------------|--------------------------|------------------------------|
| Reception or administrative staff | <input type="checkbox"/> | <input type="checkbox"/> | <input type="checkbox"/> | <input type="checkbox"/>     |
| Practice nurses                   | <input type="checkbox"/> | <input type="checkbox"/> | <input type="checkbox"/> | <input type="checkbox"/>     |
| Doctors                           | <input type="checkbox"/> | <input type="checkbox"/> | <input type="checkbox"/> | <input type="checkbox"/>     |
| Other, please specify             | <input type="checkbox"/> | <input type="checkbox"/> | <input type="checkbox"/> | <input type="checkbox"/>     |

**Q13** Research officer: Record any comments about identifying and recording whether patients are from a refugee background made while answering the questions above or subsequently.

---



---



---

## SECTION B: USE OF INTERPRETING SERVICES

Questions in this section relate to the practice's use of the Translating and Interpreting Service (TIS National) and/or informal interpreters such as bi-lingual staff and family members to communicate with patients with limited English language proficiency, particularly those from refugee backgrounds.

**Q14** Has your practice changed the way in which you work with refugees who have limited English language proficiency since taking part in the OPTIMISE Project?

- Yes, proceed to ask Q15 - Q21
- No, confirm practice responses to Q15, Q15.1, Q16, Q17, Q18, Q18.A.2, Q19 and Q20 are the same as at baseline.

**Q15** Are new patients asked what their language preferences are?

- Always or almost always
- Often
- Sometimes
- Rarely or never
- Don't know

If response is always/almost always, often or sometimes

**Q15.1** Are language preferences recorded in a patient's medical record?

- Always or almost always
- Often
- Sometimes
- Rarely or never
- Don't know

**Q16** Does the practice confirm whether a patient needs an interpreter?

- Always or almost always
- Often
- Sometimes
- Rarely or never
- Don't know



**Q16.1** How does the practice confirm a patient's need for an interpreter? (select all that apply)

- |                                                                                                                                                                  |                                                                                                                                                                                                   |
|------------------------------------------------------------------------------------------------------------------------------------------------------------------|---------------------------------------------------------------------------------------------------------------------------------------------------------------------------------------------------|
| <input type="checkbox"/> Patients state their need for an interpreter when filling out the new patient registration form                                         | <input type="checkbox"/> Family members and friends advise practice staff of the patient's language preferences and need for an interpreter                                                       |
| <input type="checkbox"/> Patients show practice staff a TIS sticker or card which states that the patient's preferred language and their need for an interpreter | <input type="checkbox"/> Case worker or client liaison officer from a referring agency (e.g. settlement) advises practice staff of the patient's language preferences and need for an interpreter |
| <input type="checkbox"/> Patients let practice staff know their preferred language by pointing it out on a TIS language card or poster displayed at the practice | <input type="checkbox"/> Other, please specify<br>_____                                                                                                                                           |

**Q16.2** Who is responsible for confirming whether a patient needs an interpreter?

- General practitioners       Practice nurses       Reception or administrative staff       Other, please specify  
\_\_\_\_\_

**Q16.3** Is the need for an interpreter recorded in a patient's medical record?

- Always or almost always       Often       Sometimes       Rarely or never       Don't know

**Q17** Does your practice display and/or provide information to patients about the availability of interpreter services at the practice?

If yes, please ask the respondents to provide copies after the survey has been completed.

- Yes       No       Don't know

**Q18** Does your practice use professional translating and interpreting services (TIS National)?

|              | Yes                   | No                    | Don't know            | No need               |
|--------------|-----------------------|-----------------------|-----------------------|-----------------------|
| By telephone | <input type="radio"/> | <input type="radio"/> | <input type="radio"/> | <input type="radio"/> |
| Face-to-face | <input type="radio"/> | <input type="radio"/> | <input type="radio"/> | <input type="radio"/> |

**If the practice does use TIS National by telephone or face to face**

**Q18.A.1** How does the practice book professional translating and interpreting services (TIS National)? (select all that apply)

- Reception or administrative staff pre-book interpreters via TIS Online
- Reception or administrative staff pre-book interpreters over the phone
- Reception or administrative staff contact interpreters over the phone just before the consultation starts
- General practitioner contacts interpreters over the phone during the consultation

**Q18.A.2** Are practice nurses able to access professional translating and interpreting services (TIS National) for patients when needed?

- Always or almost always     
 Often     
 Sometimes     
 Rarely or never     
 Don't know

**If the practice does not use professional translating and interpreting services (TIS National)**

**Q18.B.1** How do staff communicate with patients from refugee backgrounds with limited English language proficiency? (select all that apply)

- General practitioners are bi-lingual/multi-lingual in one or more refugee community languages (1)
- Other staff at the practice are bi-lingual/multi-lingual in one or more refugee community languages (2)
- Patient's family members or friends translate for the patient (3)
- Other, please specify (4) \_\_\_\_\_

**Q19** Does each clinician/office have a speaker phone?

Yes

No

Don't know

**Q20** Do phones have a TIS sticker on them?

Yes

No

Don't know

**Q21** Research officer: *Record any comments about use of interpreting services made while answering the questions above or subsequently.*

---

---

**SECTION C: ASSESSMENTS AND HEALTHCARE**

**Q22** Has your practice changed the way in which you provide care to refugees since taking part in the OPTIMISE Project?

Yes, proceed to ask Q23 - 24

No, confirm practice responses to Q23 - 24 are the same as at baseline.

**Q23** These questions relate to refugee health assessments

|                                                                                                                           | Yes                   | No                    | Don't know            | Not done in this practice |
|---------------------------------------------------------------------------------------------------------------------------|-----------------------|-----------------------|-----------------------|---------------------------|
| Does your practice use a Refugee Health Assessment template for screening people that have arrived in the last 12 months? | <input type="radio"/> | <input type="radio"/> | <input type="radio"/> | <input type="radio"/>     |
| Does your practice set aside specific appointment times for completion of refugee health assessments?                     | <input type="radio"/> | <input type="radio"/> | <input type="radio"/> | <input type="radio"/>     |
| Are longer appointments booked for refugee health assessments?                                                            | <input type="radio"/> | <input type="radio"/> | <input type="radio"/> | <input type="radio"/>     |
| Is the practice nurse involved in refugee health assessments?                                                             | <input type="radio"/> | <input type="radio"/> | <input type="radio"/> | <input type="radio"/>     |

**Q24** Does the practice use the Health Assessment Medicare items when providing care to refugee patients? For example, the MBS Item Numbers 701, 703, 705, 707 (noting that these are not specific to refugees)

- Yes                       No                       Don't know

**Q25** Research officer: *Record any comments about undertaking refugee health assessments made while answering the questions above or subsequently.*

---

---

---

---

**SECTION D: REFERRAL PATHWAYS FROM THE PRACTICE FOR REFUGEE CLIENTS**

**Q26** Has your practice changed the way in which you refer refugees to external services since taking part in the OPTIMISE Project?

- Yes, proceed to ask Q27 - 29
- No, confirm practice responses to Q27 - 29 are the same as at baseline.

**Q27** Do staff help refugee patients (who need it) with referrals, such as making an appointment or advising about potential costs.

- Always or almost always       Often       Sometimes       Rarely or never       Don't know

**Q28** Does the practice have a list of specialists and services that bulk bill for refugee patient referrals?

- Yes       No       Don't know

**Q29** Does the practice have a list of specialists who are bilingual and what languages they speak?

- Yes       No       Don't know

If yes,

**Q29.1** How is the list of bilingual specialists and the languages they speak updated? How do GPs access the list?

---

---

---

**Q30** Research officer: *Record any comments about referral pathways from the practice made while answering the questions above or subsequently.*

---

---

---

---

---

**SECTION E: EDUCATION AND TRAINING**

**Q31** Has the practice offered or supported access to any education or training about refugee health to staff over the past 6 months?

- Yes       No       Don't know

If yes,

**Q31.1** Please give details of refugee health training that practice staff may have received.  
e.g. what type of training, when & who provided it? How many GPs, nurses and other staff participated?

---

---

---

**SECTION F: FEEDBACK ON THE OPTIMISE PROJECT ACTIVITIES**

**Q32** What did the practice gain from being involved in the OPTIMISE project?

---

---

---

---

**Q33** Please tell us to what extent you found the following aspects of the OPTIMISE project helped the practice to achieve what you set out to achieve

|                                                                                                                                                       | Not at all helpful    | Slightly helpful      | Moderately helpful    | Very helpful          | Extremely helpful (essential to success) | Don't know or no opinion | This wasn't part of our experience |
|-------------------------------------------------------------------------------------------------------------------------------------------------------|-----------------------|-----------------------|-----------------------|-----------------------|------------------------------------------|--------------------------|------------------------------------|
| The face to face facilitation visits from a refugee health expert to help plan and make changes; provide support and resources.                       | <input type="radio"/> | <input type="radio"/> | <input type="radio"/> | <input type="radio"/> | <input type="radio"/>                    | <input type="radio"/>    | <input type="radio"/>              |
| The follow up phone contacts from a refugee health expert in between face to face visits to help troubleshoot issues arising                          | <input type="radio"/> | <input type="radio"/> | <input type="radio"/> | <input type="radio"/> | <input type="radio"/>                    | <input type="radio"/>    | <input type="radio"/>              |
| The availability of the facilitator beyond the planned facilitation visits and phone calls.                                                           | <input type="radio"/> | <input type="radio"/> | <input type="radio"/> | <input type="radio"/> | <input type="radio"/>                    | <input type="radio"/>    | <input type="radio"/>              |
| The action plan approach to planning change within the practice and monitoring progress                                                               | <input type="radio"/> | <input type="radio"/> | <input type="radio"/> | <input type="radio"/> | <input type="radio"/>                    | <input type="radio"/>    | <input type="radio"/>              |
| The resource book (printed or electronic) with information on how to evidence based refugee health care                                               | <input type="radio"/> | <input type="radio"/> | <input type="radio"/> | <input type="radio"/> | <input type="radio"/>                    | <input type="radio"/>    | <input type="radio"/>              |
| The cheat sheet with links to key resources on evidence based refugee health care                                                                     | <input type="radio"/> | <input type="radio"/> | <input type="radio"/> | <input type="radio"/> | <input type="radio"/>                    | <input type="radio"/>    | <input type="radio"/>              |
| The PENCS CAT4 Refugee Health data which showed what the practice was doing well and what the practice could improve upon at the start of the project | <input type="radio"/> | <input type="radio"/> | <input type="radio"/> | <input type="radio"/> | <input type="radio"/>                    | <input type="radio"/>    | <input type="radio"/>              |

**Q34** Overall, to what extent did the OPTIMISE project change the ways in which your practice:

|                                                                                                                         | Not at all            | A little              | Quite a lot           | A great deal          |
|-------------------------------------------------------------------------------------------------------------------------|-----------------------|-----------------------|-----------------------|-----------------------|
| identifies patients from refugee backgrounds and records this information in the patients' medical records              | <input type="radio"/> | <input type="radio"/> | <input type="radio"/> | <input type="radio"/> |
| identifies refugee patients' who need an interpreter and organise professional interpreting services for these patients | <input type="radio"/> | <input type="radio"/> | <input type="radio"/> | <input type="radio"/> |
| conducts comprehensive physical and mental health assessments using the Refugee Health Assessment template              | <input type="radio"/> | <input type="radio"/> | <input type="radio"/> | <input type="radio"/> |
| identifies and refers refugee patients to appropriate health and social welfare services in the region                  | <input type="radio"/> | <input type="radio"/> | <input type="radio"/> | <input type="radio"/> |

**Q35** Please provide an additional comments/feedback in the space below

---

---

---

### SECTION G: DOCUMENT CHECKLIST

**Q36** Please check that the practice has provided copies of the following documents (if applicable)

- Policy/protocol for recognising refugee patients and recording this information
- Signage or patient handouts on the availability of interpreter services (flyers, information booklets, posters etc)
- Process for referral of refugee patients to external services
- Process for confirming refugee patients' attendance at services to which they are referred
- Other, please specify \_\_\_\_\_
